# Supplementary material for: Micro-mechanical theory of shear yield stress for strongly flocculated colloidal gel
Source: Royal Society of Chemistry journal article supplement (doi:10.1039/c9sm01784d), 2020-01-01
Supplement: c9sm01784d1.pdf [file c9sm01784d1.pdf]

*Supplementary information*

**Micro-mechanical theory of shear yield stress for strongly flocculated colloidal gel**

Saikat Roy and Mahesh S Tirumkudulu

**THEORY**

The displacement vector in the rotated coordinate frame is given as,

$$\mathbf{u}' = \frac{D\epsilon_o}{4} (n'_2\mathbf{e}'_2 - n'_3\mathbf{e}'_3) \quad (1)$$

where  $\mathbf{n}' = \sin\theta\cos\phi\mathbf{e}'_1 + \sin\theta\sin\phi\mathbf{e}'_2 + \cos\theta\mathbf{e}'_3$ . Then the expression  $n'_2\mathbf{e}'_2 - n'_3\mathbf{e}'_3$  simplifies to,

$$n'_2\mathbf{e}'_2 - n'_3\mathbf{e}'_3 = \mathbf{e}'_r (\sin^2\theta\sin^2\phi - \cos^2\theta) + \mathbf{e}'_\theta \sin\theta\cos\theta (1 + \sin^2\phi) + \mathbf{e}'_\phi \sin\theta\sin\phi\cos\phi \quad (2)$$

The total contact force  $F'_i(\mathbf{n}')$  exerted by a neighboring sphere at a contact point consists of two parts, namely, normal components due to an externally imposed strain,  $P'$ , and a tangential component,  $T'_i$ , due to the external strain,

$$F'_i = -P'n'_i + T'_i. \quad (3)$$

Further, since  $T'_i$  is perpendicular to  $n'_i$ , we have

$$T'_i n'_i = 0. \quad (4)$$

Since the displacement at the particle level is due to the externally imposed strain, the force components that originate from the external strain is related to the components of the displacement. For small displacements, the magnitude of the normal component of contact force is assumed to vary linearly with the normal displacement of the contact point,

$$P' = k_n \delta'_n \quad (5)$$

where  $k_n$  is the normal stiffness coefficient. Similarly the magnitude of the tangential component of the force is related to the tangential displacement,

$$T' = k_t s' \quad (6)$$

when  $T'$  is less than the critical value required for the sphere to slide,  $T'_r = \mu(P' + F_0)$ ; the latter being the expression for Coulomb friction. The inter-particle attractive force is represented by  $F_0$  with the assumption that this force exists only when the particles are in contact. Here,  $k_t$  is the tangential stiffness coefficient and  $\mu$  is the friction coefficient for sliding.

Now, at the onset of sliding, the critical tangential displacement of the contact point is given by,

$$\begin{aligned} s'_{\theta,\phi} &= \frac{T'_r}{k_t} = \frac{\mu(P' + F_0)}{k_t} = \frac{\mu(k_n \delta'_n + F_0)}{k_t} \\ &= \bar{\mu} \delta'_n + \frac{\mu F_0}{k_t} \end{aligned} \quad (7)$$

where  $\bar{\mu} \equiv \mu k_n / k_t$ .

Now there will be two conditions for no slip, one is obtained for  $\theta$  component of tangential displacement and another one is for  $\phi$  component.

For  $\theta$  component, the condition becomes,

$$s'_{\theta} \leq \bar{\mu} \delta'_n + \frac{\mu F_0}{k_t}, \quad \bar{\mu} \equiv \frac{k_n \mu}{k_t} \quad (8)$$

Now, from Eqn. 1 and 2,  $s'_{\theta}{}^E$  and  $\delta'_n$  is given as,

$$s'_{\theta}{}^E = \frac{D\epsilon_0}{4} \sin\theta \cos\theta (1 + \sin^2\phi) \quad (9)$$

$$\delta'_n = \frac{D\epsilon_0}{4} (\sin^2\theta \sin^2\phi - \cos^2\theta) \quad (10)$$

Then from Eqn. 8 and 10 we get,

$$\bar{\epsilon}_0 F_1(\theta, \phi) \leq 1 \quad (11)$$

where  $F_1(\theta, \phi) = \{(\sin\theta\cos\theta(1 + \sin^2\phi) - \bar{\mu}(\sin^2\theta\sin^2\phi - \cos^2\theta))\}$  and  $\bar{\epsilon}_0 = \frac{D\epsilon_0k_t}{4\mu F_0}$   
 Similarly  $s'_\phi{}^E$  is given as,

$$s'_\phi{}^E = \frac{D\epsilon_0}{4} \sin\theta\sin\phi\cos\phi \quad (12)$$

Then similarly the second condition for  $\phi$  component is given as,

$$\bar{\epsilon}_o F_2(\theta, \phi) \leq 1 \quad (13)$$

whereas

$$F_2(\theta, \phi) \equiv \{\sin\theta\sin\phi\cos\phi - \bar{\mu}(\sin^2\theta\sin^2\phi - \cos^2\theta)\}.$$


---
